# Supplementary material for: On the origins of the mechanistic variants in the thermal reactions of Sx+ (x = 1–3) with benzene
Source: Royal Society of Chemistry journal article supplement (doi:10.1039/d1cp01959g), 2021-01-01
Supplement: d1cp01959g1.pdf [file d1cp01959g1.pdf]

## Supporting Information

### Additional Computational Details

The MECP was searched and optimized on the PES using the SurfCrossOpt strategy in ORCA. The complete active space self-consistent field (CASSCF) wave function,<sup>[1]</sup> with a 11-electron/11-orbital active space (11,11), was used to calculate the spin-orbit coupling (SOC) constant at the minimum energy crossing point (MECP).<sup>[2]</sup> For the  $S^+/C_6H_6$  system, five  $3p(S)$  electrons and six electrons from the phenyl ring are included in the active space; for the  $S_2^+/C_6H_6$  and  $S_3^+/C_6H_6$  systems, basically nine  $3p(S)$  electrons and two electrons from the phenyl ring are included in the active space. Note that the CASSCF calculation here is only for qualitative examination of the intersystem crossing probability, and larger active space should be employed if more accurate results are needed. However, even with the accurate SOC constants, the Landau-Zener treatment employed in this work can only generate an approximately qualitative result.<sup>[3]</sup>

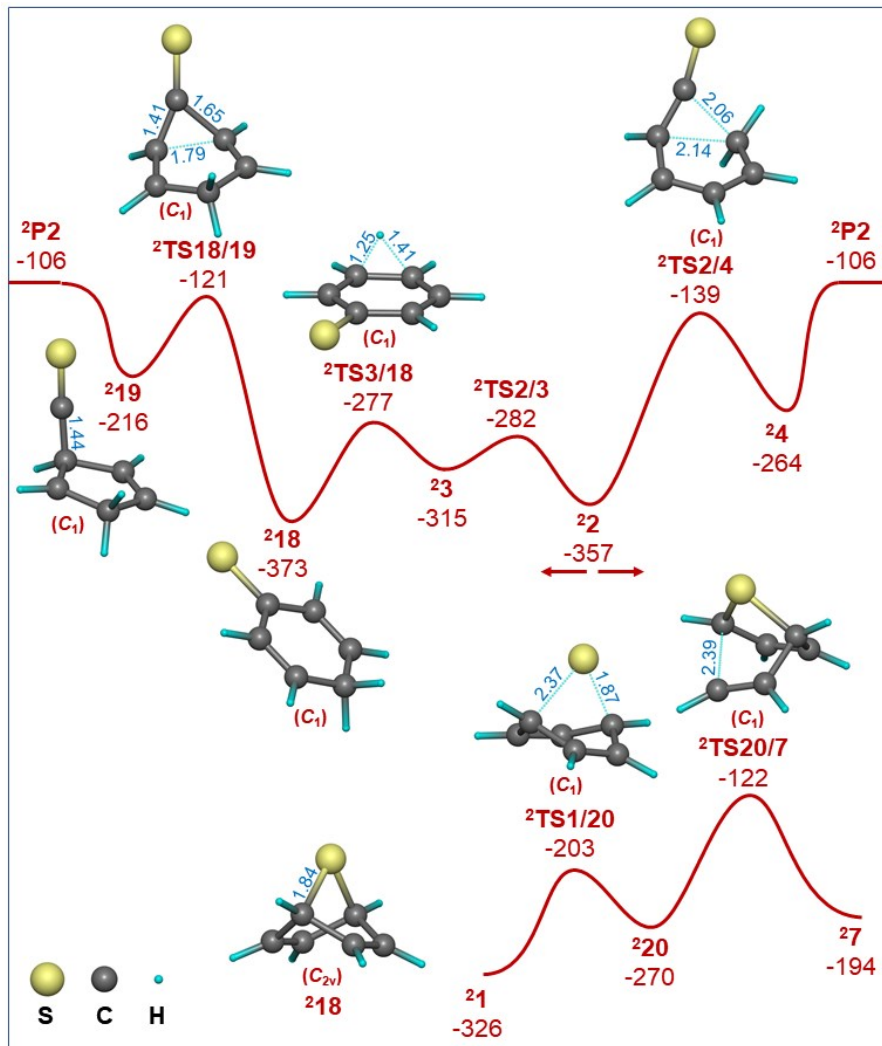

**Figure S1.** Simplified PES and selected structural information of alternative pathways for the reactions of  $S^+$  with benzene as calculated at the B2GP-PLYP-D3(BJ)/AVQZ//B3LYP-D3(BJ)/def2-TZVP level of theory. Zero-point corrected, relative energies are given in  $\text{kJ mol}^{-1}$  and bond lengths in  $\text{\AA}$ ; charges are omitted for the sake of clarity.

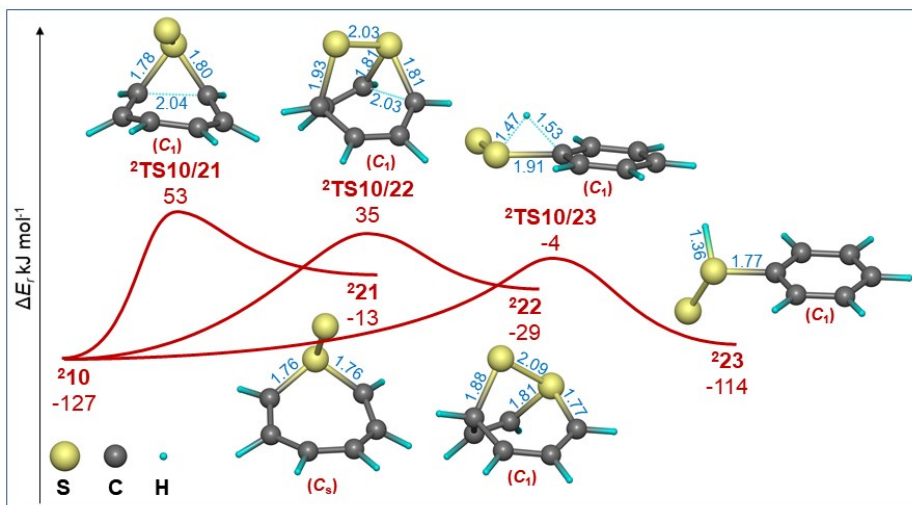

**Figure S2.** Simplified PES and selected structural information of alternative pathways for the reactions of  $S_2^+$  with benzene as calculated at the B2GP-PLYP-D3(BJ)/AVQZ//B3LYP-D3(BJ)/def2-TZVP level of theory. Zero-point corrected, relative energies are given in  $\text{kJ mol}^{-1}$  and bond lengths in  $\text{\AA}$ ; charges are omitted for the sake of clarity.

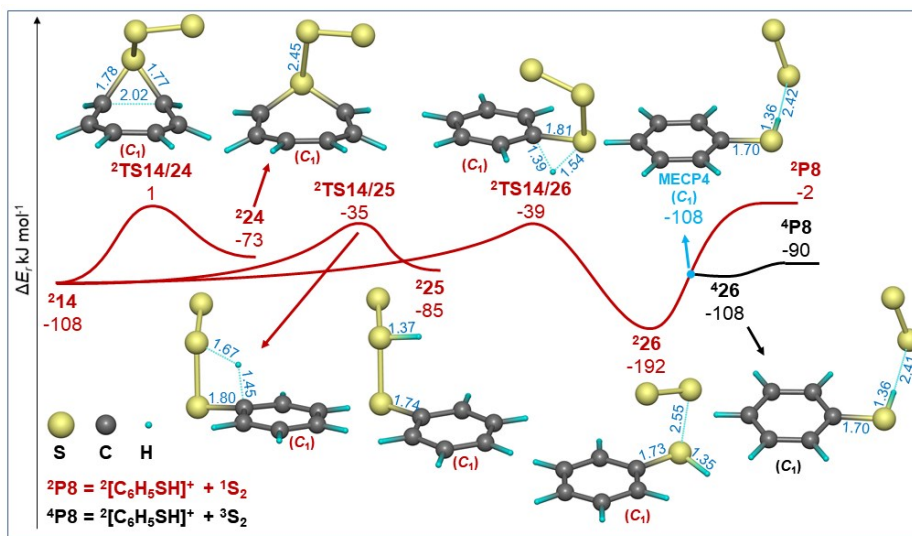

**Figure S3.** Simplified PES and selected structural information of alternative pathways for the reactions of  $S_3^+$  with benzene as calculated at the B2GP-PLYP-D3(BJ)/AVQZ//B3LYP-D3(BJ)/def2-TZVP level of theory. Zero-point corrected, relative energies are given in  $\text{kJ mol}^{-1}$  and bond lengths in  $\text{\AA}$ ; charges are omitted for the sake of clarity.

As shown in Figure S3, the sequence  ${}^2\mathbf{14} \rightarrow {}^2\mathbf{26} \rightarrow \mathbf{MECP4} \rightarrow {}^4\mathbf{P8}$  is also energetically favorable when comparing with the generation of  ${}^4\mathbf{P7}$  (see Figure 5 in the main text). However, according to the calculation, the SOC constant at  $\mathbf{MECP4}$  is only  $5 \text{ cm}^{-1}$ , suggesting a rather low ISC probability herein ( $< 0.01^{[4]}$ ). Thus, the reaction proceeds along the spin-conserving path, i.e.  ${}^2\mathbf{14} \rightarrow {}^2\mathbf{26} \rightarrow {}^2\mathbf{P8}$ , which is relatively much less competing.

**Table S1.** The relative energies and selected structural information for the triplet electromers of key intermediates in the  $S_n^+/C_6H_6$  ( $n = 1 - 3$ ) systems.

|                                                                                                                                                               |                                                                                                                                                              |                                                                                                                                                             |
|---------------------------------------------------------------------------------------------------------------------------------------------------------------|--------------------------------------------------------------------------------------------------------------------------------------------------------------|-------------------------------------------------------------------------------------------------------------------------------------------------------------|
| <p><math>{}^4\mathbf{2}</math>, <math>-94 \text{ kJ mol}^{-1}</math></p> 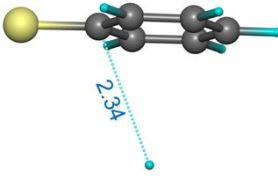    | <p><math>{}^4\mathbf{5}</math>, <math>-73 \text{ kJ mol}^{-1}</math></p>    | <p><math>{}^4\mathbf{9}</math>, <math>-62 \text{ kJ mol}^{-1}</math></p>  |
| <p><math>{}^4\mathbf{13}</math>, <math>-29 \text{ kJ mol}^{-1}</math></p>  | <p><math>{}^4\mathbf{14}</math>, <math>40 \text{ kJ mol}^{-1}</math></p>  |                                                                                                                                                             |

As shown in Table S1, these triplet species are of much higher energy as compared to their doublet electromers. Though not all triplet electromers of the intermediates involved in the transformations are listed here, it is conceivable that upon more covalent interaction of the benzene molecule with the sulfur atom(s) a higher-spin state is even less favored.

## Optimized Coordinates of Key Structures (in Å)

### <sup>2</sup>TS1/2:

|   |             |             |             |
|---|-------------|-------------|-------------|
| C | -1.60922500 | -1.18050200 | -0.03092800 |
| C | -2.24262100 | 0.04336100  | -0.07745300 |
| C | -1.50463600 | 1.24190500  | -0.02952000 |
| C | -0.13686100 | 1.22898300  | 0.06934300  |
| C | 0.57334200  | -0.01929600 | 0.08166800  |
| C | -0.20704700 | -1.24162600 | 0.01081600  |
| H | -2.17281200 | -2.10311000 | -0.04773400 |
| H | -3.32216500 | 0.08623200  | -0.13554800 |
| H | -2.02630400 | 2.18972000  | -0.04952800 |
| H | 0.43117500  | 2.14699300  | 0.13195900  |
| H | 0.24455000  | -0.57337600 | 1.16738000  |
| H | 0.32297800  | -2.18522200 | -0.00260100 |
| S | 2.33030400  | 0.00011400  | -0.07546800 |

### <sup>2</sup>TS1/5:

|   |             |             |             |
|---|-------------|-------------|-------------|
| C | -1.62576400 | -0.79097200 | -0.31719100 |
| C | -1.74689300 | 0.59106900  | -0.29279500 |
| C | -0.77208800 | 1.43194200  | 0.26857900  |
| C | 0.56580800  | 1.13949500  | 0.39927000  |
| C | 0.69816600  | -0.90802500 | 0.66414900  |
| C | -0.56851200 | -1.45018200 | 0.28391800  |
| H | -2.46240300 | -1.38184700 | -0.66351300 |
| H | -2.68661400 | 1.03448000  | -0.59821000 |
| H | -1.09255300 | 2.37769800  | 0.69282400  |
| H | 1.19387800  | 1.77043700  | 1.01914100  |
| H | 1.24246600  | -1.30633000 | 1.51332400  |
| H | -0.66722100 | -2.51537600 | 0.48485600  |
| S | 1.57300900  | -0.00368900 | -0.53025000 |

### <sup>2</sup>TS1/9:

|   |             |             |             |
|---|-------------|-------------|-------------|
| C | -1.55216000 | -1.23105600 | -0.03974700 |
| C | -2.23917200 | -0.00825700 | -0.09933400 |
| C | -1.56313400 | 1.22505100  | -0.02287300 |
| C | -0.20151300 | 1.25178200  | 0.09720900  |
| C | 0.52329200  | 0.01078600  | 0.11971500  |
| C | -0.18981300 | -1.24000900 | 0.10146100  |
| H | -2.09892900 | -2.16224100 | -0.09534900 |
| H | -3.31793500 | -0.01267700 | -0.19153000 |
| H | -2.12381800 | 2.14865100  | -0.06671500 |
| H | 0.35005800  | 2.18015600  | 0.15018400  |
| H | 1.34337000  | -0.10858400 | 1.11171300  |
| H | 0.37250400  | -2.16106300 | 0.17444500  |
| S | 2.30060900  | 0.00412400  | -0.12633400 |

**<sup>2</sup>TS2/3:**

|   |             |             |             |
|---|-------------|-------------|-------------|
| C | -0.11886400 | 1.21963000  | 0.01553300  |
| C | -0.11855700 | -1.19053600 | -0.04741500 |
| C | 0.60796700  | 0.02323800  | -0.00509800 |
| C | -1.56543900 | -1.16882900 | -0.03829900 |
| C | -2.25082400 | 0.06580300  | -0.03452000 |
| C | -1.51438200 | 1.23367000  | -0.00223700 |
| H | 0.41372800  | 2.16136400  | 0.04717000  |
| H | 0.37942400  | -2.15060700 | -0.08674200 |
| H | -0.98207500 | -1.27333500 | 1.05975900  |
| H | -3.33076900 | 0.07792500  | -0.05439200 |
| H | -2.02298800 | 2.18858000  | 0.00891800  |
| S | 2.33717300  | 0.00028700  | -0.00835400 |
| H | -2.09149800 | -2.10637900 | -0.16883800 |

**<sup>2</sup>TS2/4:**

|   |             |             |             |
|---|-------------|-------------|-------------|
| C | 1.44780800  | 1.16326500  | -0.22596100 |
| C | 1.94801300  | -0.00249200 | -0.73083600 |
| C | 1.44064300  | -1.18034800 | -0.14511000 |
| C | 0.25155900  | -1.05439600 | 0.62735000  |
| C | -0.85787300 | -0.34302200 | 0.20355000  |
| C | 0.49328900  | 1.05902600  | 0.88468800  |
| H | 1.72961400  | 2.14421000  | -0.58755600 |
| H | 2.74270900  | -0.02510600 | -1.46347100 |
| H | 1.98848900  | -2.11225000 | -0.12180700 |
| H | 0.10770500  | -1.64807700 | 1.53144600  |
| H | 0.90955300  | 0.84868200  | 1.87007200  |
| H | -0.33575300 | 1.75612700  | 0.93392500  |
| S | -2.21768500 | 0.07401300  | -0.36529300 |

**<sup>2</sup>TS3/4:**

|   |             |             |             |
|---|-------------|-------------|-------------|
| C | -0.14194200 | 0.90394300  | 0.58108400  |
| C | -0.25298000 | -0.99399200 | 0.50357200  |
| C | 0.74827200  | -0.13340000 | 0.02920800  |
| C | -1.62623200 | -1.11382700 | -0.10042100 |
| C | -2.15212000 | 0.22267000  | -0.46690400 |
| C | -1.39816400 | 1.24551800  | -0.02341700 |
| H | 0.33575500  | 1.56258800  | 1.29832400  |
| H | 0.03859700  | -1.69736900 | 1.27792400  |
| H | -2.28987500 | -1.59213900 | 0.62649800  |
| H | -3.07808500 | 0.33658400  | -1.01243800 |
| H | -1.67729400 | 2.28870900  | -0.09423500 |
| S | 2.32464600  | 0.00668100  | -0.26695000 |
| H | -1.58444200 | -1.79073600 | -0.96359900 |

**<sup>2</sup>TS3/18:**

|   |            |             |            |
|---|------------|-------------|------------|
| C | 0.29659100 | -0.84119000 | 0.83133400 |
|---|------------|-------------|------------|

|   |             |             |             |
|---|-------------|-------------|-------------|
| C | 0.28490800  | 0.94431500  | 0.71845100  |
| C | -0.79598000 | 0.21207200  | 0.19543800  |
| C | 1.42529900  | 1.16150700  | -0.14227200 |
| C | 1.97115500  | -0.09320400 | -0.72165600 |
| C | 1.31983300  | -1.20227900 | 0.01941900  |
| H | -0.16192500 | -1.43172200 | 1.61155400  |
| H | 0.11348900  | 1.53261900  | 1.61714100  |
| H | 1.85840000  | -0.20318900 | -1.81056600 |
| H | 1.67707200  | -2.22313000 | -0.04134800 |
| S | -2.21736600 | -0.04624800 | -0.37752400 |
| H | 3.05680700  | -0.14029100 | -0.55928800 |
| H | 1.92316400  | 2.11836100  | -0.18139400 |

**<sup>2</sup>TS5/6:**

|   |             |             |             |
|---|-------------|-------------|-------------|
| C | -0.02273400 | 1.29349900  | 0.50883300  |
| C | 1.10942700  | 1.20885800  | -0.47086900 |
| C | 1.57059300  | -0.02077800 | -0.60986600 |
| C | -0.85491500 | -1.23019500 | -0.36257000 |
| C | -1.72423000 | -0.18536600 | -0.45983500 |
| C | -1.36939600 | 1.02148500  | 0.17591100  |
| H | 0.14331100  | 1.95438200  | 1.35858600  |
| H | 1.46984700  | 2.10141600  | -0.97062700 |
| H | 2.33627800  | -0.45518600 | -1.23359100 |
| S | 0.60241200  | -0.95708200 | 0.58659600  |
| H | -1.01071500 | -2.20722200 | -0.80090700 |
| H | -2.68682500 | -0.30929200 | -0.94008400 |
| H | -2.14296800 | 1.70418800  | 0.51145500  |

**<sup>2</sup>TS6/7:**

|   |             |             |             |
|---|-------------|-------------|-------------|
| C | 0.36845500  | 0.64903900  | 0.67702500  |
| C | 1.66505800  | 0.77296000  | -0.08125400 |
| C | 2.03126900  | -0.31294200 | -0.70963900 |
| C | -1.46974700 | -0.75535100 | -0.34366900 |
| C | -1.74057500 | 0.63735600  | -0.45772900 |
| C | -0.77246200 | 1.40747800  | 0.09055800  |
| H | 0.46741500  | 0.83077600  | 1.75418600  |
| H | 2.21129800  | 1.71451000  | -0.09445800 |
| H | 2.78643200  | -0.74900700 | -1.34308900 |
| S | -0.02613800 | -1.13411600 | 0.38426400  |
| H | -2.10816400 | -1.54277400 | -0.72248600 |
| H | -2.63830900 | 1.01269600  | -0.92764100 |
| H | -0.79245400 | 2.48841100  | 0.13351000  |

**<sup>2</sup>TS7/8:**

|   |            |             |             |
|---|------------|-------------|-------------|
| C | 0.26869700 | 0.30101600  | -0.87611300 |
| C | 2.06588000 | 0.46602300  | 0.01227300  |
| C | 2.34912500 | -0.40986500 | 0.83542400  |

|   |             |             |             |
|---|-------------|-------------|-------------|
| C | -1.59408700 | -0.31548300 | 0.62252200  |
| C | -1.41535100 | 1.06823800  | 0.56041500  |
| C | -0.40209200 | 1.42190800  | -0.30686000 |
| H | 0.70298000  | 0.30318200  | -1.86756900 |
| H | 2.44519700  | 1.34194800  | -0.47866700 |
| H | 2.43689900  | -1.23629200 | 1.50681900  |
| H | -2.01591400 | 1.76577900  | 1.12483000  |
| H | -0.10942600 | 2.43952800  | -0.52467700 |
| S | -0.54831700 | -1.18542500 | -0.37976100 |
| H | -2.31970700 | -0.83837700 | 1.22947800  |

**<sup>2</sup>TS10/11:**

|   |             |             |             |
|---|-------------|-------------|-------------|
| C | -2.81699000 | -0.00051200 | -0.32433100 |
| C | -2.15728300 | -1.21984600 | -0.14554700 |
| C | -0.82882100 | -1.23674400 | 0.21319700  |
| C | -0.11525900 | 0.00044900  | 0.29999300  |
| C | -0.82935500 | 1.23716400  | 0.21157700  |
| C | -2.15780600 | 1.21925500  | -0.14748700 |
| H | -3.86458300 | -0.00093700 | -0.59652800 |
| H | -2.69373900 | -2.15051000 | -0.26931500 |
| H | -0.30138500 | -2.16850100 | 0.36877100  |
| H | 0.52208200  | -0.00068600 | -0.86836300 |
| H | -0.30236300 | 2.16934100  | 0.36615700  |
| H | -2.69456800 | 2.14955500  | -0.27262700 |
| S | 1.58327200  | 0.00125100  | 0.95126400  |
| S | 2.33970500  | -0.00105400 | -0.91204600 |

**<sup>2</sup>TS10/12:**

|   |             |             |             |
|---|-------------|-------------|-------------|
| C | -2.89297700 | 0.47987000  | -0.07057100 |
| C | -1.91748300 | 1.45101800  | -0.03436400 |
| C | -0.56248300 | 1.07946100  | 0.02305700  |
| C | -0.20646900 | -0.31616900 | 0.08129100  |
| C | -1.24920900 | -1.29250700 | 0.04329000  |
| C | -2.55697000 | -0.88966100 | -0.02714500 |
| H | -3.93426300 | 0.76777700  | -0.13013100 |
| H | -2.17113200 | 2.50150000  | -0.06680400 |
| H | 0.24316000  | 1.80448400  | 0.02473500  |
| H | -0.33941500 | 0.30144800  | 1.16523800  |
| H | -0.98624000 | -2.34233800 | 0.06257000  |
| H | -3.34365300 | -1.63186400 | -0.05586000 |
| S | 1.50070300  | -0.91707800 | -0.05312700 |
| S | 2.67711400  | 0.63751100  | -0.01519200 |

**<sup>2</sup>TS10/21:**

|   |            |             |             |
|---|------------|-------------|-------------|
| C | 0.36629400 | -1.44125000 | -0.63072700 |
| C | 0.74421900 | 0.18256400  | 1.58669800  |
| C | 1.23605200 | 1.06672600  | 0.60382100  |



|   |             |             |             |
|---|-------------|-------------|-------------|
| C | 1.63616600  | 0.62877400  | -0.67936900 |
| C | 1.38288800  | -0.64695800 | -1.13554100 |
| H | 0.25607700  | -2.49914200 | -0.83108500 |
| H | 2.28732900  | 1.27955100  | -1.24712200 |
| H | 2.00097900  | -1.07876700 | -1.91450100 |
| H | 1.59199500  | 2.03427500  | 0.93323100  |
| S | -1.19074000 | -0.72709000 | -0.06407600 |
| S | -1.23321900 | 1.25151800  | -0.42235400 |
| C | -0.05082600 | -0.91427400 | 1.29466400  |
| H | 1.04301200  | 0.33120900  | 2.61843200  |
| H | -0.28480800 | -1.71146000 | 1.98664100  |

**<sup>2</sup>TS10/22:**

|   |             |             |             |
|---|-------------|-------------|-------------|
| C | 0.34632200  | 0.91135200  | 1.28491600  |
| C | -0.36608900 | -0.19840200 | 1.64030200  |
| C | -0.72717500 | -1.13499200 | 0.53207200  |
| C | -1.74118900 | -0.53881600 | -0.37877100 |
| C | -1.58265600 | 0.73386300  | -0.80752800 |
| C | -0.41955300 | 1.48537300  | -0.50455900 |
| H | 0.64781800  | 1.74727800  | 1.89653300  |
| H | -0.78820000 | -0.32356400 | 2.62765500  |
| H | -0.96893800 | -2.14107100 | 0.86162100  |
| H | -2.58615000 | -1.13983500 | -0.68326500 |
| H | -2.34675600 | 1.22731600  | -1.39568400 |
| H | -0.32473200 | 2.54963900  | -0.67697400 |
| S | 0.88592100  | -1.29473100 | -0.52303700 |
| S | 1.19589100  | 0.70285400  | -0.30374300 |

**<sup>2</sup>TS10/23:**

|   |             |             |             |
|---|-------------|-------------|-------------|
| C | 2.93252900  | 0.47569900  | -0.04903900 |
| C | 2.60609400  | -0.88066800 | -0.04011300 |
| C | 1.28099100  | -1.27241200 | 0.02122000  |
| C | 0.30723800  | -0.26259600 | 0.04307100  |
| C | 0.60401000  | 1.09931800  | 0.05631200  |
| C | 1.93821800  | 1.45845400  | -0.00068000 |
| H | 3.97176400  | 0.77317100  | -0.08893800 |
| H | 3.38384700  | -1.63082900 | -0.07546800 |
| H | 1.00655900  | -2.31955600 | 0.03874600  |
| H | -0.66912600 | -0.67261700 | 1.14319000  |
| H | -0.18285500 | 1.84101900  | 0.08316000  |
| H | 2.20870700  | 2.50533600  | -0.01446300 |
| S | -1.49569100 | -0.88832400 | -0.05264000 |
| S | -2.73764500 | 0.62561800  | -0.02678900 |

**<sup>2</sup>TS13/14:**

|   |             |             |             |
|---|-------------|-------------|-------------|
| C | -2.20057900 | -0.60874300 | -1.21921000 |
| C | -1.72779700 | 0.68729000  | -1.22689000 |

|   |             |             |             |
|---|-------------|-------------|-------------|
| C | -1.44819500 | 1.34310800  | 0.00050600  |
| C | -1.72755900 | 0.68632700  | 1.22744100  |
| C | -2.20034000 | -0.60969700 | 1.21882800  |
| C | -2.43614100 | -1.25235400 | -0.00042300 |
| H | -2.40624900 | -1.11985500 | -2.14942200 |
| H | -1.55596100 | 1.21010100  | -2.15781900 |
| H | -1.28776900 | 2.41640200  | 0.00091200  |
| H | -1.55554900 | 1.20840700  | 2.15874800  |
| H | -2.40583700 | -1.12154200 | 2.14867700  |
| H | -2.81677900 | -2.26577200 | -0.00078200 |
| S | 0.88065400  | 1.03986800  | 0.00014800  |
| S | 1.22981400  | -0.96804600 | -0.00010000 |
| S | 3.04402000  | -0.18453000 | -0.00016200 |

**<sup>2</sup>TS14/15:**

|   |             |             |             |
|---|-------------|-------------|-------------|
| C | -2.11447800 | 1.17880100  | 0.75625400  |
| C | -0.94676600 | 0.44794100  | 1.06813700  |
| C | -0.62258400 | -0.75405900 | 0.31527100  |
| C | -1.50016500 | -1.14144500 | -0.73877500 |
| C | -2.62126600 | -0.40027100 | -1.01010200 |
| C | -2.93006600 | 0.75793700  | -0.26523600 |
| H | -2.33951000 | 2.07040600  | 1.32454500  |
| H | -0.27148200 | 0.75183400  | 1.85508900  |
| H | -1.29618300 | -0.78788500 | 1.41971500  |
| H | -1.24836700 | -2.01828600 | -1.31844500 |
| H | -3.27840700 | -0.70383300 | -1.81436400 |
| H | -3.82293500 | 1.31961700  | -0.50543400 |
| S | 0.91774700  | -1.56686200 | 0.60578400  |
| S | 2.19785600  | -0.16511700 | -0.50536300 |
| S | 1.67619900  | 1.65915000  | -0.20757100 |

**<sup>2</sup>TS14/24:**

|   |             |             |             |
|---|-------------|-------------|-------------|
| C | -0.79522100 | 1.13232400  | 1.31572900  |
| C | -0.88104000 | -0.25529100 | 1.47418200  |
| C | -1.83116700 | -1.03115400 | -0.12686200 |
| C | -2.14615800 | 0.01372500  | -1.00227900 |
| C | -1.58411600 | 1.27152200  | -0.99179300 |
| C | -0.94151400 | 1.81515500  | 0.13071600  |
| H | -0.68832600 | 1.69508100  | 2.23617100  |
| H | -1.02940700 | -0.70003800 | 2.45034600  |
| H | -2.49045800 | -1.88182000 | -0.00481200 |
| H | -2.96844900 | -0.18489300 | -1.68076600 |
| H | -1.83804900 | 1.94564700  | -1.79917600 |
| H | -0.74315500 | 2.87880200  | 0.12790100  |
| S | -0.17838300 | -1.45089400 | 0.36830100  |
| S | 1.34176000  | -0.40217800 | -0.97051600 |
| S | 2.51369500  | 0.51366800  | 0.21922600  |

**<sup>2</sup>TS14/25:**

|   |             |             |             |
|---|-------------|-------------|-------------|
| C | 2.93294700  | -0.48950500 | -0.86012400 |
| C | 1.73427700  | -1.07614600 | -0.52033900 |
| C | 0.80838600  | -0.36809300 | 0.30453800  |
| C | 1.19128000  | 0.89626900  | 0.85685900  |
| C | 2.39563400  | 1.45953700  | 0.50167600  |
| C | 3.26234100  | 0.77041400  | -0.35176600 |
| H | 3.62598200  | -1.01086800 | -1.50594800 |
| H | 1.46609800  | -2.05795800 | -0.88628900 |
| H | 0.50914000  | 1.40342700  | 1.52602300  |
| H | 2.67817700  | 2.42499700  | 0.89817800  |
| H | 4.21057300  | 1.21861000  | -0.61897000 |
| S | -0.61892700 | -1.23391900 | 0.98087900  |
| S | -1.69969200 | -0.29995300 | -0.66505500 |
| S | -3.07768800 | 0.95211200  | -0.21053500 |
| H | -0.09825800 | 0.17509200  | -0.68268200 |

**<sup>2</sup>TS14/26:**

|   |             |             |             |
|---|-------------|-------------|-------------|
| C | -2.04956800 | 0.97642400  | 1.01473200  |
| C | -0.88455800 | 0.23491000  | 1.13793100  |
| C | -0.61256700 | -0.79469500 | 0.19516500  |
| C | -1.50131100 | -1.03093400 | -0.88479100 |
| C | -2.65022100 | -0.28266200 | -0.97445900 |
| C | -2.92746200 | 0.71507900  | -0.02691600 |
| H | -2.27258500 | 1.74527100  | 1.74130700  |
| H | -0.21797700 | 0.38075000  | 1.97709500  |
| H | -0.31561100 | -1.78558300 | 1.11621900  |
| H | -1.26801700 | -1.79532200 | -1.61220300 |
| H | -3.34213800 | -0.46025800 | -1.78641000 |
| H | -3.84217700 | 1.28657000  | -0.11157800 |
| S | 0.96998000  | -1.67309900 | 0.27473200  |
| S | 2.42143600  | 0.15257700  | -0.09219200 |
| S | 1.29687400  | 1.62801200  | -0.43844000 |

**<sup>2</sup>TS15/16:**

|   |             |             |             |
|---|-------------|-------------|-------------|
| C | 1.60963000  | 1.09815900  | -0.71991000 |
| C | 0.82500000  | -0.45875800 | 0.94528000  |
| C | 0.60803500  | 0.70602200  | 0.15807400  |
| C | 2.06609400  | -1.18155400 | 0.82958800  |
| C | 3.05231700  | -0.74173200 | -0.08189600 |
| C | 2.81718700  | 0.39224500  | -0.82742700 |
| H | 1.44786300  | 1.96854600  | -1.34220200 |
| H | 0.08010300  | -0.81494800 | 1.64159100  |
| H | 1.91106200  | -0.25148600 | 1.70570300  |
| H | 3.97112600  | -1.30154500 | -0.18115100 |
| H | 3.56598000  | 0.74064100  | -1.52629900 |
| S | -0.85774000 | 1.63909100  | 0.28676100  |
| H | 2.18317300  | -2.09911400 | 1.39181700  |

|   |             |             |             |
|---|-------------|-------------|-------------|
| S | -2.40953800 | 0.08960400  | 0.08756700  |
| S | -1.67202700 | -1.54922000 | -0.59381000 |

**<sup>2</sup>TS16/17:**

|   |             |             |             |
|---|-------------|-------------|-------------|
| C | -1.97172000 | 1.12029500  | 0.42857600  |
| C | -0.85734200 | -0.83144400 | -0.46988100 |
| C | -0.78991500 | 0.48958200  | -0.05500300 |
| C | -2.08944300 | -1.52422600 | -0.42739500 |
| C | -3.27220700 | -0.87306200 | 0.07615900  |
| C | -3.17957800 | 0.47185600  | 0.48027300  |
| H | -1.91153700 | 2.14957100  | 0.76107100  |
| H | 0.01611900  | -1.35223500 | -0.83019300 |
| H | -2.87261000 | -1.00401300 | -1.25818600 |
| H | -4.19687200 | -1.43098500 | 0.13732600  |
| H | -4.05963300 | 0.97903800  | 0.84990600  |
| S | 0.64086600  | 1.49321800  | -0.05485700 |
| H | -2.12640300 | -2.58449200 | -0.64524300 |
| S | 2.22850100  | 0.18814500  | -0.66708400 |
| S | 2.63764300  | -1.04854400 | 0.77125000  |

**MECP1:**

|   |                   |                   |                   |
|---|-------------------|-------------------|-------------------|
| C | -1.48918285317009 | 0.91854333634088  | 0.28229237741629  |
| C | -1.68109456090096 | -0.45950258714690 | 0.41523537573350  |
| C | -0.77496540479988 | -1.35245807068933 | -0.16239277287311 |
| C | 0.34111673831745  | -0.85683450079960 | -0.87196516135579 |
| C | 0.52063841700751  | 0.53720271353126  | -1.01423050541805 |
| C | -0.39498505415001 | 1.41665724117053  | -0.43080484373035 |
| H | -2.19452587120585 | 1.60490243306410  | 0.73168871854808  |
| H | -2.53441006349690 | -0.83757055434248 | 0.96233833857091  |
| H | -0.92223371150504 | -2.42059145309178 | -0.07110137522931 |
| H | 1.02481600007625  | -1.54346961077100 | -1.35414514087513 |
| H | 1.36501275880055  | 0.91519350592000  | -1.57526003613968 |
| H | -0.25713117867567 | 2.48475557773064  | -0.53570922450389 |
| S | 1.30790237370265  | -0.47278408091632 | 1.41635221985653  |

**MECP2:**

|   |            |             |             |
|---|------------|-------------|-------------|
| C | 2.72401916 | 0.06954162  | -0.68315057 |
| C | 2.41314795 | -1.15355247 | -0.00631776 |
| C | 1.39200367 | -1.20247426 | 0.90526026  |
| C | 0.69293516 | -0.01399316 | 1.19618594  |
| C | 0.97551937 | 1.20505988  | 0.47442913  |
| C | 1.99571918 | 1.23412528  | -0.45304553 |
| H | 3.54134583 | 0.07412749  | -1.39409104 |
| H | 3.00751259 | -2.03305093 | -0.21699323 |
| H | 1.16274581 | -2.11328315 | 1.44070289  |
| H | 0.00358689 | 0.02529024  | 2.02810709  |
| H | 0.40260987 | 2.09046537  | 0.71271350  |
| H | 2.22752392 | 2.14461845  | -0.98747892 |

|   |             |             |             |
|---|-------------|-------------|-------------|
| S | -1.26319240 | -0.01953260 | -1.33343593 |
| S | -2.21639599 | 0.39728526  | 0.32017618  |

**MECP3:**

|   |                   |                   |                   |
|---|-------------------|-------------------|-------------------|
| C | 0.91822359035304  | -0.89723701481404 | 0.01393460052761  |
| C | 2.25258685778617  | 1.20157705112602  | 0.00701473136737  |
| C | 0.97803699146958  | 0.53646384292819  | 0.01933165331421  |
| C | 3.39173157109815  | 0.48019983941872  | -0.00436027574725 |
| C | 3.39134498349186  | -0.99399123189582 | -0.00488009411782 |
| C | 2.05674929756827  | -1.61998325437914 | 0.00368959634992  |
| H | -0.04640370046953 | -1.38224136497122 | 0.01922475634397  |
| H | 2.27995578001544  | 2.28303816222130  | 0.00923634145371  |
| H | 3.97089596992348  | -1.36698314680033 | -0.86549095213705 |
| H | 2.00632197915864  | -2.70235339225862 | -0.00036143232401 |
| S | -0.40938725225863 | 1.48349669099097  | 0.03975196983719  |
| H | 4.34900840230112  | 0.98747909345021  | -0.01201701671137 |
| S | -2.72581965241222 | -0.34938334194803 | 0.91982664356111  |
| S | -2.83344542908738 | -0.45409078569264 | -0.99270272173391 |
| H | 3.98123961106199  | -1.36661614737556 | 0.84899920001634  |

**MECP4:**

|   |                   |                   |                   |
|---|-------------------|-------------------|-------------------|
| C | 1.82948566039654  | -1.71376415604814 | -0.43584066365334 |
| C | 0.89103664812975  | -0.71432441090350 | -0.43386189454987 |
| C | 1.27668952961780  | 0.59724931029982  | -0.04284965855309 |
| C | 2.62086489017889  | 0.86982310306849  | 0.34273474438864  |
| C | 3.54236054460175  | -0.14590003909653 | 0.33433320922541  |
| C | 3.15469593155421  | -1.43892055093894 | -0.05352208109637 |
| H | 1.55243484801749  | -2.71615257086849 | -0.73247347055422 |
| H | -0.13127956112193 | -0.91221382692508 | -0.72401209810860 |
| H | -0.93181423061095 | 1.24044845527849  | -0.41016732600756 |
| H | 2.90067915289107  | 1.87270788731813  | 0.63858049041409  |
| H | 4.56572844374340  | 0.04658362963594  | 0.62572366780155  |
| H | 3.88650634297311  | -2.23651763088134 | -0.05842390053349 |
| S | 0.18863495836846  | 1.90779968985345  | -0.01026507870823 |
| S | -2.97806530914343 | -0.75662056519729 | 0.96034425430312  |
| S | -2.95535684959617 | -0.02644532459501 | -0.80022719436804 |

## References

- [1] a) B. O. Roos, P. R. Taylor, P. E. M. Siegbahn, *Chem. Phys.* **1980**, *48*, 157-173; b) B. O. Roos, *International Journal of Quantum Chemistry* **1980**, *17*, 175-189; c) P. Siegbahn, A. Heiberg, B. Roos, B. Levy, *Phys. Scr.* **1980**, *21*, 323-327.
- [2] J. N. Harvey, M. Aschi, H. Schwarz, W. Koch, *Theor Chem Acc* **1998**, *99*, 95-99.
- [3] D. Danovich, S. Shaik, *Journal of the American Chemical Society* **1997**, *119*, 1773-1786.
- [4] The probabilities for ISC are estimated using the Landau-Zener model. For more details of this model, see: C. Zener, *Proc. R. Soc. London Ser. A* **1932**, *137*, 696-702.
